# Supplementary material
Source: PubMed Central journal article supplement (PMC6819910)
Supplement: JVI.01011-19-s0001.pdf [file JVI.01011-19-s0001.pdf]

**Supplementary table S1.**

**Summary of groups and outcomes after experimental infection with Ab4 or**

**Ab4ΔORF2 nine-months prior to this experimental EHV-1 Ab4 challenge infection <sup>a</sup>.**

|                                         | <b>Control</b>                   | <b>Ab4ΔORF2</b>                                   | <b>Ab4</b>                         |
|-----------------------------------------|----------------------------------|---------------------------------------------------|------------------------------------|
| Infection                               | Not infected                     | Ab4ΔORF2 <sup>b</sup>                             | Ab4 <sup>b</sup>                   |
| Horses (n)                              | 8 per group                      |                                                   |                                    |
| Sex                                     | 4 mares and 4 geldings per group |                                                   |                                    |
| Age, median (range)                     | 2 (2-3 years)                    | 3 (2-4 years)                                     | 3 (2-3 years)                      |
| Fever (>38.5°C)                         | none                             | Reduced initial fever                             | Fever peak 36-60 h pi <sup>c</sup> |
| Clinical signs                          | none                             | Mild respiratory disease                          |                                    |
| Nasal virus shedding <sup>d</sup>       | none                             | 7/8 horses, lower viral amounts than in Ab4 group | 7/8 horses                         |
| Cell-associated viremia <sup>e</sup>    | none                             | All horses, similar in both groups                |                                    |
| Intranasal immunity <sup>f</sup>        | none                             | Intranasal antibody response                      |                                    |
| Systemic antibody response <sup>f</sup> | none                             | Strong systemic antibody response                 |                                    |
| Systemic cellular response <sup>g</sup> | none                             | Undetectable T cell response                      |                                    |

<sup>a</sup> Full description in Schnabel *et al.*, 2018, BMC Vet Res;

<https://doi.org/10.1186/s12917-018-1563-4>

<sup>b</sup> Horses were infected intranasally with  $1 \times 10^7$  plaque forming units (PFU)

<sup>c</sup> pi = post infection

<sup>d</sup> measured by virus isolation

<sup>e</sup> analyzed by real-time PCR in PBMC using the EHV-1 gB gene

<sup>f</sup> EHV-1 gB, gC, and gD-specific antibody quantification using a fluorescent bead-based multiplex assay

<sup>g</sup> evaluated by flow cytometric analysis of IFN- $\gamma$  producing T-cells in PBMC after re-stimulation with EHV-1 *in vitro*
